# Supplementary material for: Comparative Complete Chloroplast Genome of Nine Species in Litsea (Lauraceae) and Uncover Evolutionary Dynamic Patterns
Source: Research Square preprint supplement (doi:10.21203/rs.3.rs-1068132/v1), 2021-11-12
Supplement: Supplementary file 1 [file 0fae1880a6f8cec5bbfd4eca.xlsx]

## Sheet: Sheet 1
Comparative analyses of different tyepes of substitutions in litsea species
Species	Region	Transition substitutions		Transversion substitutions
		A/G	C/T	A/T	A/C	C/G	G/T
L. auriculata		109	106	25	46	6	63
L. chunii	Large	137	129	20	52	11	80
L. ichangensis		129	139	26	58	11	75
L. moupinensis	single	134	139	21	58	10	78
L. populifolia	copy	129	138	22	60	10	80
L. rubescens		134	140	22	58	10	78
L. sericea		123	129	23	55	10	78
L. tsinlingensis		136	127	19	56	11	73
L. veitchiana		127	128	21	59	10	75
L. auriculata		3	5	0	2	2	11
L. chunii	Inverted repeat	4	8	2	12	1	15
L. ichangensis		4	5	1	3	1	3
L. moupinensis		3	8	2	12	1	12
L. populifolia		3	6	2	12	1	11
L. rubescens		3	8	2	12	1	11
L. sericea		3	6	3	12	1	12
L. tsinlingensis		2	9	2	12	1	14
L. veitchiana		3	7	2	12	1	12
L. auriculata		43	47	5	21	3	16
L. chunii	Small	42	37	10	19	4	17
L. ichangensis		42	45	5	24	5	21
L. moupinensis		38	41	5	24	6	21
L. populifolia	single	37	43	4	19	5	21
L. rubescens	copy	38	41	5	10	6	21
L. sericea		38	39	6	19	5	24
L. tsinlingensis		42	37	5	20	4	18
L. veitchiana		37	43	4	18	5	22
