# Supplementary material for: Comparative Complete Chloroplast Genome of Nine Species in Litsea (Lauraceae) and Uncover Evolutionary Dynamic Patterns
Source: Research Square preprint supplement (doi:10.21203/rs.3.rs-1068132/v1), 2021-11-12
Supplement: Supplementary file 2 [file 6927302e1feda3465a7fc6c4.xlsx]

## Sheet: Sheet1
Codon	AA	Freq	RSCU	Codon	AA	Freq	RSCU
GCU	A (Ala)	620	1.79	AAU	N (Asn)	879	1.52
GCC	A (Ala)	223	0.65	AAC	N (Asn)	276	0.48
GCA	A (Ala)	398	1.15	CCU	P (Pro)	386	1.48
GCG	A (Ala)	141	0.41	CCC	P (Pro)	239	0.92
UGU	C (Cys)	219	1.5	CCA	P (Pro)	285	1.09
UGC	C (Cys)	73	0.5	CCG	P (Pro)	134	0.51
GAU	D (Asp)	799	1.58	CAA	Q (Gin)	644	1.46
GAC	D (Asp)	210	0.42	CAG	Q (Gin)	240	0.54
GAA	E (Glu)	974	1.48	CGU	R (Arg)	339	1.33
GAG	E (Glu)	345	0.52	CGC	R (Arg)	88	0.34
UUU	F (Phe)	795	1.17	CGA	R (Arg)	347	1.36
UUC	F (Phe)	562	0.83	CGG	R (Arg)	111	0.43
GGC	G (Gly)	201	0.46	AGA	R (Arg)	464	1.82
GGG	G (Gly)	314	0.73	AGG	R (Arg)	183	0.72
GGU	G (Gly)	537	1.24	AGU	S (Ser)	388	1.18
GGA	G (Gly)	678	1.57	AGC	S (Ser)	110	0.33
CAU	H (His)	479	1.53	UCU	S (Ser)	520	1.58
CAC	H (His)	149	0.47	UCC	S (Ser)	343	1.04
AUU	I (He)	1009	1.44	UCA	S (Ser)	407	1.24
AUC	I (He)	447	0.64	UCG	S (Ser)	205	0.62
AUA	I (He)	652	0.93	ACU	T (Thr)	496	1.51
AAA	K (Lys)	923	1.47	ACC	T (Thr)	271	0.83
AAG	K (Lys)	333	0.53	ACA	T (Thr)	387	1.18
UUA	L (Leu)	737	1.72	ACG	T (Thr)	157	0.48
UUG	L (Leu)	541	1.26	GUU	V (Val)	509	1.44
CUU	L (Leu)	529	1.23	GUC	V (Val)	197	0.56
CUC	L (Leu)	191	0.45	GUA	V (Val)	490	1.39
CUA	L (Leu)	380	0.89	GUG	V (Val)	219	0.62
CUG	L (Leu)	194	0.45	UAU	Y (Tyr)	720	1.57
AUG	M (Met)	591	1	UAC	Y (Tyr)	200	0.43
UGG	W (Trp)	424	1

## Sheet: Sheet2
AA	Codon	Freq	RSCU	SUM
A	GCA	398	1.15	1382
	GCC	223	0.65	1382
	GCG	141	0.41	1382
	GCU	620	1.79	1382
C	UGC	73	0.5	292
	UGU	219	1.5	292
D	GAC	210	0.42	1009
	GAU	799	1.58	1009
E	GAA	974	1.48	1319
	GAG	345	0.52	1319
F	UUC	562	0.83	1357
	UUU	795	1.17	1357
G	GGA	678	1.57	1730
	GGC	201	0.46	1730
	GGG	314	0.73	1730
	GGU	537	1.24	1730
H	CAC	149	0.47	628
	CAU	479	1.53	628
I	AUA	652	0.93	2108
	AUC	447	0.64	2108
	AUU	1009	1.44	2108
K	AAA	923	1.47	1256
	AAG	333	0.53	1256
L	CUA	380	0.89	2572
	CUC	191	0.45	2572
	CUG	194	0.45	2572
	CUU	529	1.23	2572
	UUA	737	1.72	2572
	UUG	541	1.26	2572
M	AUG	591	1	2572
N	AAC	276	0.48	1155
	AAU	879	1.52	1155
P	CCA	285	1.09	1044
	CCC	239	0.92	1044
	CCG	134	0.51	1044
	CCU	386	1.48	1044
Q	CAA	644	1.46	884
	CAG	240	0.54	884
R	AGA	464	1.82	1532
	AGG	183	0.72	1532
	CGA	347	1.36	1532
	CGC	88	0.34	1532
	CGG	111	0.43	1532
	CGU	339	1.33	1532
S	AGC	110	0.33	1973
	AGU	388	1.18	1973
	UCA	407	1.24	1973
	UCC	343	1.04	1973
	UCG	205	0.62	1973
	UCU	520	1.58	1973
T	ACA	387	1.18	1311
	ACC	271	0.83	1311
	ACG	157	0.48	1311
	ACU	496	1.51	1311
V	GUA	490	1.39	1415
	GUC	197	0.56	1415
	GUG	219	0.62	1415
	GUU	509	1.44	1415
W	UGG	424	1	1415
Y	UAC	200	0.43	920
	UAU	720	1.57	920
