# Supplementary material for: Comparative Complete Chloroplast Genome of Nine Species in Litsea (Lauraceae) and Uncover Evolutionary Dynamic Patterns
Source: Research Square preprint supplement (doi:10.21203/rs.3.rs-1068132/v1), 2021-11-12
Supplement: Supplementary file 4 [file be9abb46f24ef720d82acd26.xlsx]

## Sheet: Sheet1
		Group of Genes	Gene Names	Amount
		Pholosystem I	psaA, psaB, psaC, psal, psaJ	5
		Photosystem II	psbA, psbK, psbl, psbM, psbD, psbC, psbZ, psbG, psbL, psbF, psbE, psbB, psbT, psbN, psbH	15
		Cytochrome	petA, petG, petL, petN, petB, petD	6
		ATP syntliase	atpA, atpF, atpH, atpI, atpE, atpB	6
		NADH dehydrogenase	ndhJ, ndhB*, ndhK, ndhC, ndhD, ndhF, ndhE, ndhG, ndhl, ndhA, ndhH	12
		RubisCO large subunit	rbcL	1
		RNA polymerase	RpoCl, rpoC2, rpoB, rpoA	4
		Ribosomal proteins (SSU)	rps16, rpsl2*, rps2, rps14, rps4, rps18, rps7*, rps11, rps8, rps3, rps19, rps15	14
		Ribosomal proteins (LSU)	rpl33, rpl20, rpl36, rpll4, rpll6, rpl22, rpl2, rpl23, rpl32	9
		Transfer RNAs	trnH-GUG, trnK-UUU, trnQ-UUG, trnS-GCU, trnG-UCC, trnR-UCU, trnC-GCA, trnD-GUC, trnY-GUA, trnE-UUC, trnT-GGU, trnS-UGA, trnG-UCC, trnT-GGU, trnS-UGA, trnG-UCQ, trnM-CAU, trnS-GGA, trnT-UGU, trnL-UAA, trnF-GUU , trnV-UAC, trnM-CAU, trnW-CCA, trnP-UGG, trnl-CAU, trnA-UGC, trnR-ACG, trnL-UAG, trnN-GUU, trnR-GUG, trnA-UGC, trnl-GAU, trnL-CAA	34
		Ribosomal RNAs	rrn4.5*, rrn5*, rrn16*, rrn23*	8
		clpPjnatK	matK	1
		Hypothetical chloroplast reading frames (ycf)	ycfl, ycf2, ycf3, ycf4	4
		Other senes	accD, clpP, ccsA, cemA, infA, rpoA	6
		* Gene with two copies.
