# Supplementary material for: Comparative Complete Chloroplast Genome of Nine Species in Litsea (Lauraceae) and Uncover Evolutionary Dynamic Patterns
Source: Research Square preprint supplement (doi:10.21203/rs.3.rs-1068132/v1), 2021-11-12
Supplement: Supplementary file 6 [file ef26fd26aefb18931c2717b5.xlsx]

## Sheet: types of repeats
	Complement repeats	Forward repeats	Palindromic repeats	Reverse repeats
L. auriculata	2	9	16	10
L. chunii	1	10	15	5
L. ichangensis	1	17	16	4
L. moupinensis	1	13	15	6
L. populifolia	1	14	16	5
L. rubescens	1	14	15	6
L. sericea	1	14	18	6
L. tsinlingensis	1	10	16	5
L. veitchiana	2	12	17	6

## Sheet: repeats region
	LSC	SSC	IR
L. auriculata	87	20	12
L. chunii	79	18	12
L. ichangensis	85	20	12
L. moupinensis	80	19	12
L. populifolia	79	19	12
L. rubescens	80	19	12
L. sericea	80	20	12
L. tsinlingensis	81	18	12
L. veitchiana	79	19	12

## Sheet: repeats length
	20	21	22	23	25	26	27	28	29	31	33	38	44	＞45
L. auriculata	14	8	2	3	1	2	1	1	0	0	4	0	0	1
L. chunii	11	6	3	1	1	2	1	1	0	0	4	0	0	1
L. ichangensis	14	5	2	1	1	2	2	1	1	0	4	0	4	1
L. moupinensis	11	7	2	1	1	2	1	1	0	0	4	0	4	1
L. populifolia	12	6	3	1	1	2	1	1	0	0	4	0	4	1
L. rubescens	11	7	2	1	1	2	1	1	0	1	4	0	4	1
L. sericea	13	9	2	1	1	2	1	1	0	0	4	0	4	1
L. tsinlingensis	9	7	3	2	1	2	1	1	0	0	4	1	0	1
L. veitchiana	13	6	3	1	1	2	1	1	0	0	4	0	4	1
