# Supplementary material for: Comparative Complete Chloroplast Genome of Nine Species in Litsea (Lauraceae) and Uncover Evolutionary Dynamic Patterns
Source: Research Square preprint supplement (doi:10.21203/rs.3.rs-1068132/v1), 2021-11-12
Supplement: Supplementary file 7 [file ef5411c7eb8fd70270439541.xlsx]

## Sheet: Sheet1
		SSR	L. auriculata	L. chunii	L. ichangensis	L. moupinensis	L. populifolia	L. rubescens	L. sericea	L. tsinlingensis	L. veitchiana	Percentage (%)
		Mono:										56.97
		A/T	68	59	65	60	60	60	62	59	61
		C/G	2	3	4	2	2	2	1	5	1
		Di:										32.09
		AC/GT	2	2	2	2	2	2	2	2	2
		AG/CT	17	14	16	16	16	16	16	14	16
		AT/AT	19	19	18	18	18	18	18	19	18
		Tri:										2.38
		AAG/CTT	-
		AAT/ATT	3	3	2	3	2	3	3	3	2
		AGG/CCT	-
		Tetra:										7.04
		AAAG/CTTT	1
		AAAT/ATTT	2	4	4	4	4	4	4	4	4
		AACT/AGTT	1	1	1	1	1	1	1	1	1
		AATG/ATTC	2	2	2	2	2	2	2	2	2
		ACAT/ATGT	1	1	1	1	1	1	1	1	1
		AGGG/CCCT	-			-	-	-	-	-	-
		Penta:										0.89
		AAAAG/CTTTT	-	-	-	-	-		-	-	-
		AAATC/ATTTG	1	1	1	1	1	1	1	1	1
		AACAT/ATGTT	-	-	-	-	-	-	-	-
		AATAT/ATATT	-	-	-	-	-		-	-	-
		Hexa:										0.63
		AAATAG/ATTTCT	-	-	1	1	1	1	1	-	1
		AATATG/ATATTC	-	-	-	-	-	-	-		-
		Total	119	109	117	111	110	111	112	111	110	100
