# Supplementary material for: Comparative Complete Chloroplast Genome of Nine Species in Litsea (Lauraceae) and Uncover Evolutionary Dynamic Patterns
Source: Research Square preprint supplement (doi:10.21203/rs.3.rs-1068132/v1), 2021-11-12
Supplement: Supplementary file 9 [file 75a2fe754eb217c8d1d7f3eb.xlsx]

## Sheet: Sheet1
Species	GenBank accession numbers	genus	family	order
Litsea acutivena	NC_050362	Litsea	Lauraceae	Laurales
Litsea coreana	MK674781	Litsea	Lauraceae	Laurales
Litsea cubeba	NC_048954	Litsea	Lauraceae	Laurales
Litsea dilleniifolia	NC_050363	Litsea	Lauraceae	Laurales
Litsea elongata	NC_050364	Litsea	Lauraceae	Laurales
Litsea garrettii	NC_050349	Litsea	Lauraceae	Laurales
Litsea glutinosa	KU382356	Litsea	Lauraceae	Laurales
Litsea japonica	NC_045267	Litsea	Lauraceae	Laurales
Litsea mollis	NC_050366	Litsea	Lauraceae	Laurales
Litsea monopetala	NC_050367	Litsea	Lauraceae	Laurales
Litsea pungens	NC_050368	Litsea	Lauraceae	Laurales
Litsea szemaois	NC_050369	Litsea	Lauraceae	Laurales
Litsea_auriculata	MW35549	Litsea	Lauraceae	Laurales
Litsea_chunii	MW802254	Litsea	Lauraceae	Laurales
Litsea_ichangensis	MW802255	Litsea	Lauraceae	Laurales
Litsea_moupinensis	MW802256	Litsea	Lauraceae	Laurales
Litsea_populifolia	MW802257	Litsea	Lauraceae	Laurales
Litsea_rubescens	MW802258	Litsea	Lauraceae	Laurales
Litsea_sericea	MW802259	Litsea	Lauraceae	Laurales
Litsea_tsinlingensis	MW802260	Litsea	Lauraceae	Laurales
Litsea_veitchiana	MW802261	Litsea	Lauraceae	Laurales
Neolitsea sericea	MW465540	Neolitsea	Lauraceae	Laurales
Actinodaphne obovata	MN274947	Actinodaphne	Lauraceae	Laurales
