# Supplementary material for: Comparative Complete Chloroplast Genome of Nine Species in Litsea (Lauraceae) and Uncover Evolutionary Dynamic Patterns
Source: Research Square preprint supplement (doi:10.21203/rs.3.rs-1068132/v1), 2021-11-12
Supplement: Supplementary file 10 [file c063bbfb506aee59b0f6d5f1.xlsx]

## Sheet: Sheet1
Comparative analyses of InDel sites
Species	Large single copy		Inverted repeat		Small single copy
	No's of InDels	InDels' average length	No's of InDels	InDels' average length	No's of InDels	InDels' average length
L. auriculata	86	4.4 (bp)	16	103.3 (bp)	18	1.3 (bp)
L. chunii	89	8.4 (bp)	3	458.7 (bp)	20	1.4 (bp)
L. ichangensis	99	3.7 (bp)	5	276.0 (bp)	19	1.6 (bp)
L. moupinensis	88	3.7 (bp)	4	339.0 (bp)	16	1.9 (bp)
L. populifolia	86	3.8 (bp)	4	339.0 (bp)	17	1.5 (bp)
L. rubescens	88	3.9 (bp)	5	272.4 (bp)	16	1.9 (bp)
L. sericea	86	3.7 (bp)	4	339.0 (bp)	19	2.0 (bp)
L. tsinlingensis	87	9.1 (bp)	2	678.0 (bp)	19	1.4 (bp)
L. veitchiana	88	3.7 (bp)	4	339.0 (bp)	18	1.8 (bp)
Average	88.6	4.9 (bp)	5.2	349.4 (bp)	18	1.6 (bp)
