# Supplementary material for: Comparative Complete Chloroplast Genome of Nine Species in Litsea (Lauraceae) and Uncover Evolutionary Dynamic Patterns
Source: Research Square preprint supplement (doi:10.21203/rs.3.rs-1068132/v1), 2021-11-12
Supplement: Supplementary file 11 [file fb8b506d9b42591bceab72cb.xlsx]

## Sheet: Sheet 1
Genome features	L. auriculata	L. chunii	L. ichangensis	L. moupinensis	L. populifolia	L. rubescens	L. sericea	L. tsinlingensis	L. veitchiana
Genome size (bp)	152377	152081	152747	152588	152619	152581	152717	152051	152578
LSC size (bp)	93535	93138	93631	93552	93569	93550	93583	93093	93540
SSC size (bp)	18814	18813	18902	18824	18838	18819	18900	18828	18826
IR size (bp)	20014	20065	20107	20106	20106	20106	20117	20065	20106
Total GC content (%)	0.392	0.392	0.392	0.392	0.392	0.392	0.391	0.392	0.392
GC content in LSC (%)	0.379	0.379	0.38	0.379	0.38	0.379	0.379	0.379	0.38
GC content in SSC (%)	0.339	0.339	0.339	0.339	0.339	0.339	0.339	0.34	0.34
GC content in IR (%)	0.444	0.444	0.444	0.444	0.444	0.444	0.444	0.444	0.444
Number of genes[unique]	128 [113]	128 [113]	128 [113]	128 [113]	128 [113]	128 [113]	128 [113]	128 [113]	128 [113]
Protein genes [unique]	84 [79]	84 [79]	84 [79]	84 [79]	84 [79]	84 [79]	84 [79]	84 [79]	84 [79]
tRNA genes [unique]	9 [4]	8 [4]	8 [4]	8 [4]	8 [4]	8 [4]	8 [4]	8 [4]	8 [4]
rRNA genes [unique]	36 [30]	36 [30]	36 [30]	36 [30]	36 [30]	36 [30]	36 [30]	36 [30]	36 [30]
Accession numbers in GenBank	MW802253	MW802254	MW802255	MW802256	MW802257	MW802258	MW802259	MW802260	MW802261
Protein-coding regions (%)	0.491157	0.493454	0.490576	0.491244	0.491145	0.491228	0.491537	0.49367	0.491237
rRNA and tRNA (%)	0.0850719	0.0753546	0.0881196	0.0882114	0.0881935	0.0895197	0.0881369	0.0885229	0.0882172
Intergenic sequences and pseudogenes (%)	0.301896	0.299216	0.309302	0.308471	0.308605	0.0135535	0.308302	0.299012	0.308459
Duplicated genes in IR	13	13	13	13	13	13	13	13	13
